# Supplementary material
Source: PubMed Central journal article supplement (PMC4744515)
Supplement: NIHMS744581-supplement-1.pdf [file NIHMS744581-supplement-1.pdf]

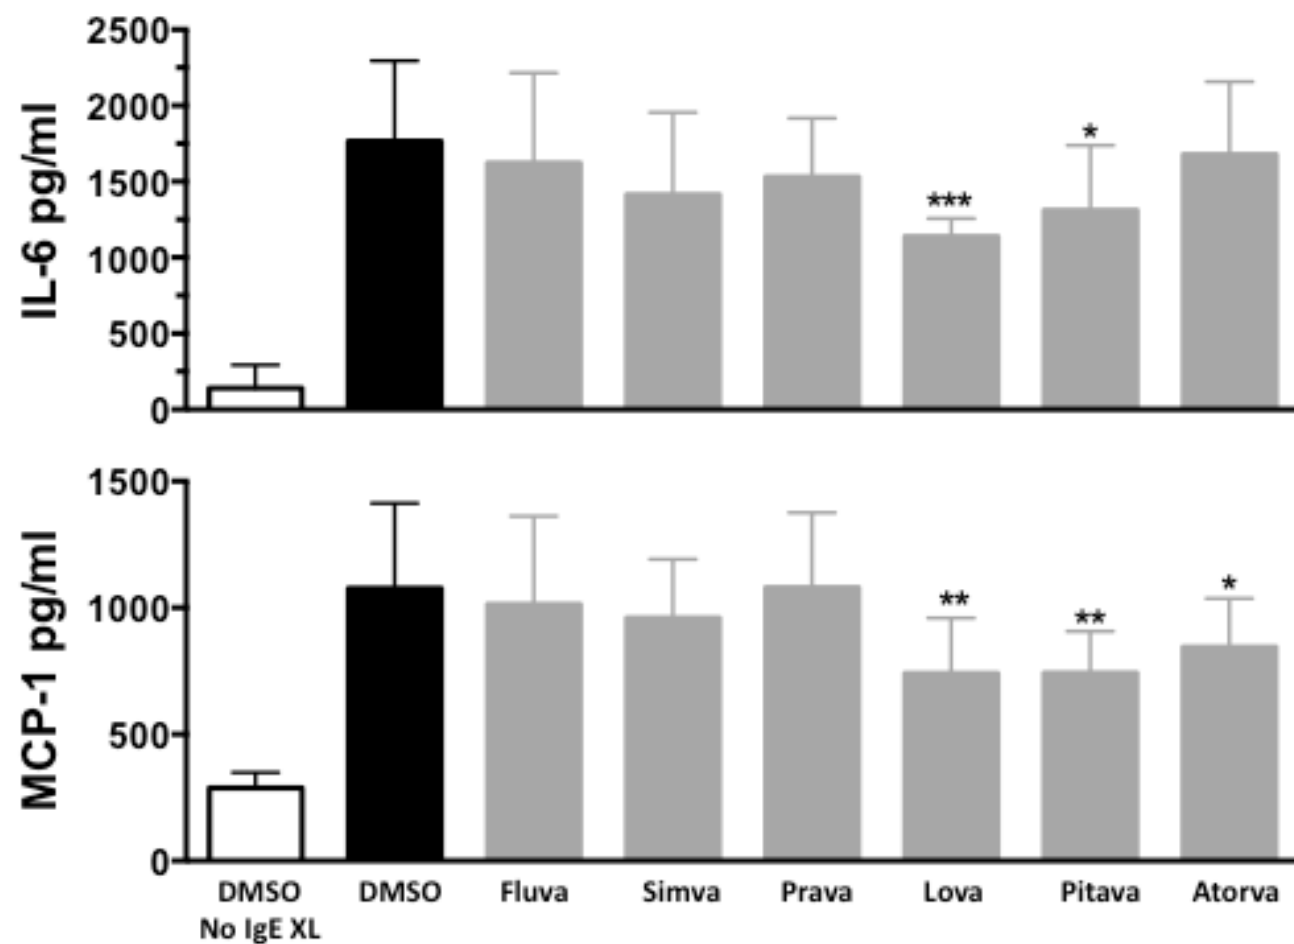

**Figure S1. 129/SvImJ BMDC are resistant to several statin drugs.**

129/SvImJ BMDC were cultured for 24 hours in the indicated statins (10 $\mu$ M) and activated with IgE+antigen (IgE XL) as described in Figure 1. Data are means and SD from 5 populations analyzed in triplicate, from two independent experiments.

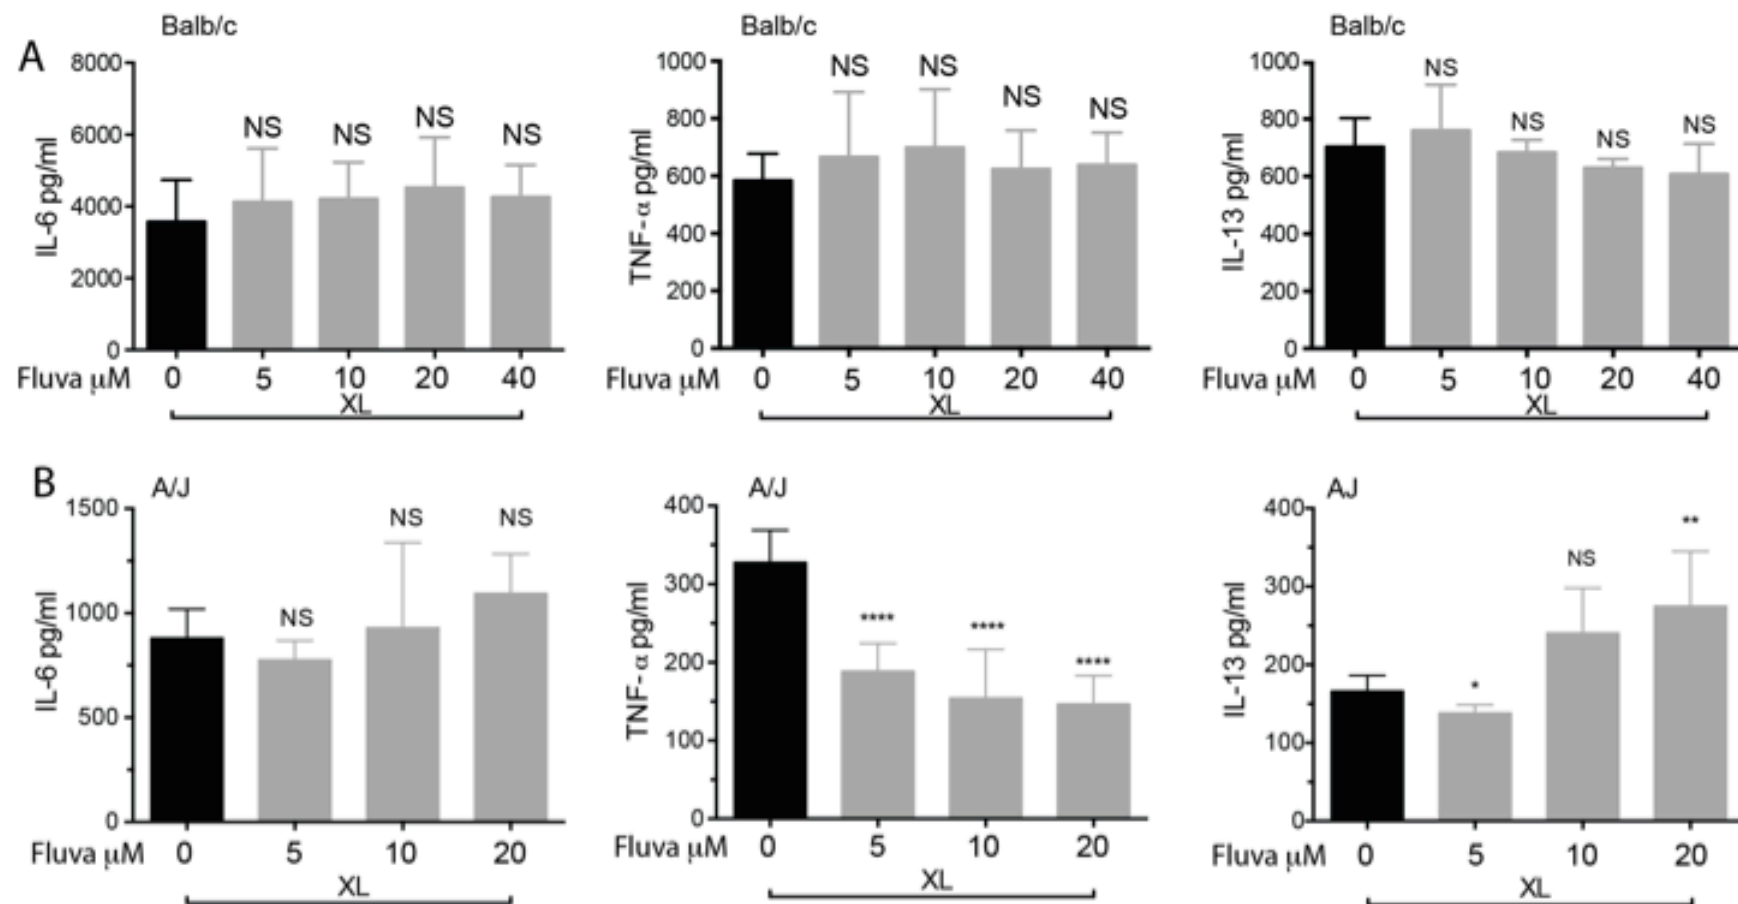

**Figure S2. Varied responses to fluvastatin among mouse strains.**

BMMC from the indicated mouse strains were cultured and activated as described in Figure 1. Culture supernatants were assayed by ELISA. Data are means and SEM of (A) three independent experiments and (B) three samples.
